# Supplementary material
Source: publisher figshare collection journal article supplement (https://wiley.figshare.com/articles/dataset/_/3520562)
Supplement: Supplementary file 1 [file 1]

Sean C. Anderson, Jonathan W. Moore, Michelle M. McClure, Nicholas K. Dulvy, Andrew B. Cooper. 2014. Portfolio conservation of metapopulations under climate change. *Ecological Applications* 25:559–572.

APPENDIX E. An illustration of the correlation between populations.

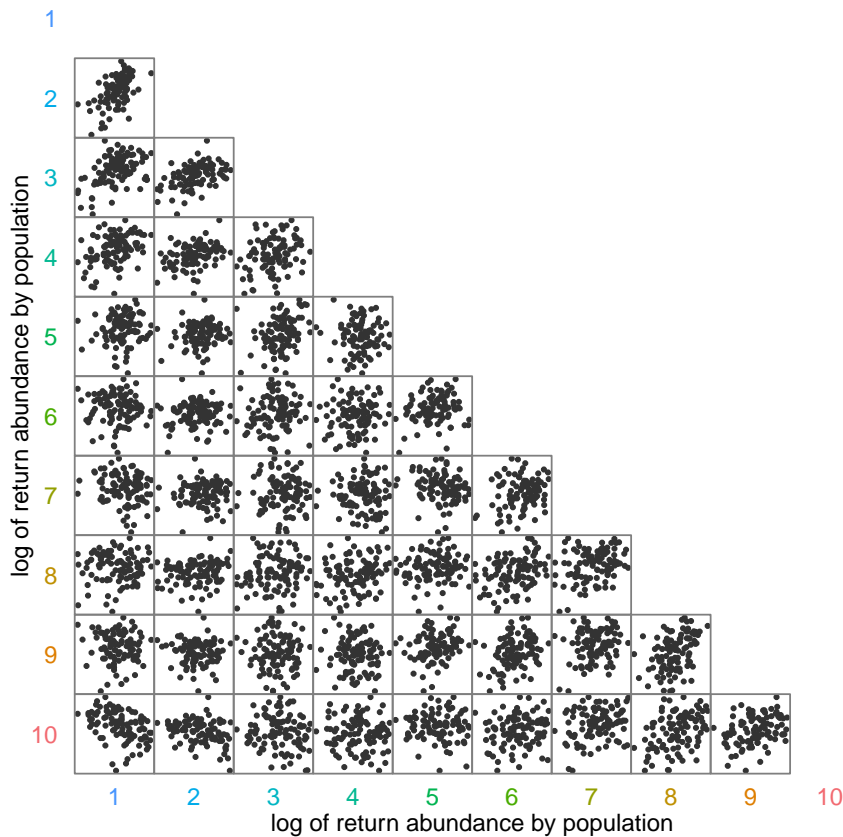

FIG. E1. A comparison of the  $\log(\text{returns})$  between populations. The sub-population IDs are colored from warm tolerant (warm colors) to cool tolerant (cool colors). Note how populations 1 and 10 have asynchronous returns whereas populations with more similar thermal-tolerance curves (say populations 9 and 10) have more synchronous dynamics. Populations with thermal tolerance curves in the middle (e.g. population 6) are less correlated with other populations. Their population dynamics end up primarily driven by demographic stochasticity and less so by temperature-induced systematic changes in productivity.
